# Supplementary material
Source: MDPI journal article supplement (https://www.mdpi.com/2227-9040/10/3/101)
Supplement: s1 [file s1]

Archive with 2 entries (2 files):
- chemosensors-1599907-sm.pdf
- Synthesis and NMR characterisation of the reference dyes.pdf
