# Supplementary material
Source: MDPI journal article supplement (https://www.mdpi.com/2227-9040/10/3/101)
Supplement: s1 [file s1 › chemosensors-1599907-sm.pdf]

Supplementary Materials

# Surface-Enhanced Raman Spectroscopy for the Investigation of Chromogenic Motion Picture Films: A Preliminary Study

Margherita Longoni \*, Francesco Ferretti, Sofia Zucca, Letizia Caielli and Silvia Bruni \*

Department of Chemistry, Università degli Studi di Milano, via C. Golgi 19, Milano, Italy; francesco.ferretti@unimi.it (F.F.); sofia.zucca@studenti.unimi.it (S.Z.); letizia.caielli@studenti.unimi.it (L.C.)

\* Correspondence: margherita.longoni@unimi.it (M.L.); silvia.bruni@unimi.it (S.B.)

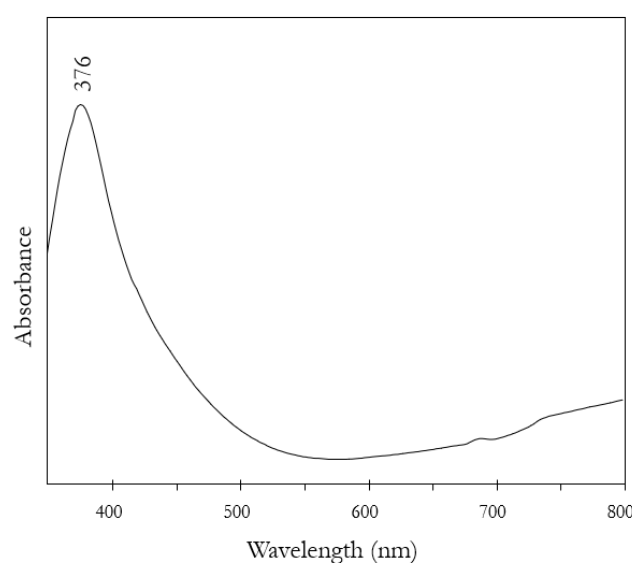

**Figure S1.** UV-visible spectrum of the silver nanostar colloid.

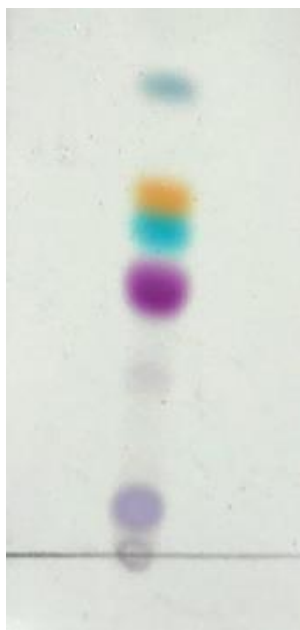

**Figure S2.** TLC separation of the extract from the emulsion obtained from the Fujicolour positive film.

**Citation:** Longoni, M.; Ferretti, F.; Zucca, S.; Caielli, L.; Bruni, S. Surface-Enhanced Raman Spectroscopy for the Investigation of Chromogenic Motion Picture Films: A Preliminary Study. *Chemosensors* **2022**, *10*, 101. <https://doi.org/10.3390/chemosensors10030101>

Academic Editor(s): Lucio Littì

Received: 31 January 2022

Accepted: 3 March 2022

Published: 6 March 2022

**Publisher's Note:** MDPI stays neutral with regard to jurisdictional claims in published maps and institutional affiliations.

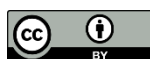

**Copyright:** © 2022 by the authors. Submitted for possible open access publication under the terms and conditions of the Creative Commons Attribution (CC BY) license (<https://creativecommons.org/licenses/by/4.0/>).

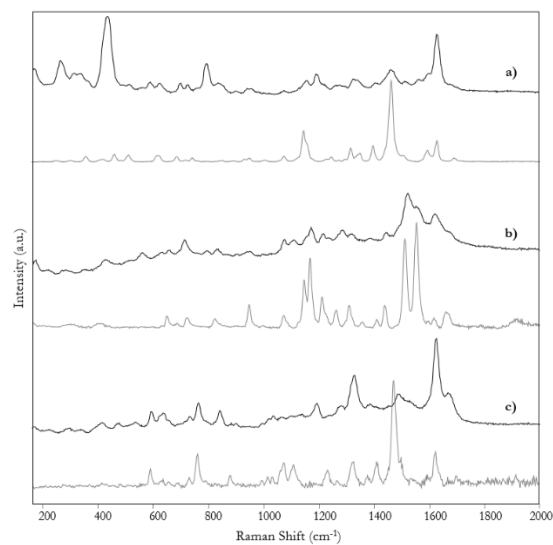

**Figure S3.** Comparison between SERS (black line) and SSE<sup>TM</sup> Raman (grey line) spectra of **a)** cyan, **b)** yellow and **c)** magenta reference dyes. The SERS spectra were obtained from 10 mM ethanolic solutions, the Raman ones from the pure powder dyes.

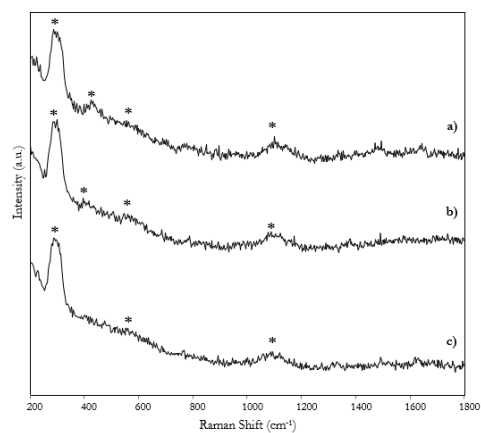

**Figure S4.** Normal Raman spectra ( $\lambda_{\text{exc}} = 532 \text{ nm}$ ) obtained from ethanolic solution (10 mM) of the **a)** cyan, **b)** yellow and **c)** magenta reference dyes. \* = signals due to glass.
